# Supplementary material for: MxMn8O16 (M = Ag or K) as promising cathode materials for secondary Mg based batteries: the role of the cation M
Source: Royal Society of Chemistry journal article supplement (doi:10.1039/c6cc00025h), 2016-01-01
Supplement: c6cc00025h1.pdf [file c6cc00025h1.pdf]

## Supplementary information

$M_xMn_8O_{16}$  (M = Ag or K) as Promising Cathode Materials

for Secondary Mg Based Batteries: the Role of the cation M

Jianping Huang<sup>1</sup>, Altug S. Poyraz<sup>2</sup>, Kenneth J. Takeuchi<sup>1,3,\*</sup>, Esther S. Takeuchi<sup>1,2,3,\*</sup>  
and Amy C. Marschilok<sup>1,3,\*</sup>

1. Department of Chemistry, Stony Brook University, Stony Brook, NY 11794
2. Energy Sciences Directorate, Brookhaven National Laboratory, Upton, NY 11973
3. Department of Materials Science and Engineering, Stony Brook University, Stony Brook, NY 11794

\*corresponding authors: (KJT) [kenneth.takeuchi.1@stonybrook.edu](mailto:kenneth.takeuchi.1@stonybrook.edu), (EST) [esther.takeuchi@stonybrook.edu](mailto:esther.takeuchi@stonybrook.edu), (ACM) [amy.marschilok@stonybrook.edu](mailto:amy.marschilok@stonybrook.edu)

### Experimental Section

$Ag_xMn_8O_{16}$  was synthesized by an ambient pressure reflux and  $K_xMn_8O_{16}$  was synthesized using a low temperature solvent-free method as previously reported.<sup>1-3</sup> The materials were characterized by X-ray diffraction (XRD) using a Rigaku SmartLab system (Cu K $\alpha$  radiation) with Bragg-Brentano focusing geometry. Elemental composition was analyzed by inductively coupled plasma-optical emission spectroscopy (ICP-OES) using a Thermo Scientific iCAP 6000 series spectrometer.

Thermogravimetric analysis (TGA) was conducted using a TA instruments SDT Q600 instrument. Transmission electron microscopy (TEM) data and selected area electron diffraction patterns (SAED) were collected by a transmission electron microscope (JEOL JEM 1400) equipped with a Gatan CCD camera. X-ray photoelectron

spectroscopy (XPS) experiments were carried out using a SPECS Phoibos spectrometer. Cathode samples for XPS, TEM, and SAED analysis after electrochemical cycling were isolated after charge, subsequent to 30 discharge-charge cycles at a 50 mA/g rate.

All electrochemical tests were conducted using a three-electrode assembly with silver/silver ion ( $\text{Ag}/\text{Ag}^+$ ) as reference electrode and carbon counter electrode. 0.5 M magnesium bis(trifluoromethylsulfonylimide) ( $\text{Mg}(\text{TFSI})_2$ ) in acetonitrile ( $\text{CH}_3\text{CN}$ ) / dipropylene glycol dimethyl ether (0.5 M) was used as the electrolyte. 3 M water was added to form the water containing electrolyte. Cyclic voltammetry data was collected between voltage limits of -0.8 and +1.0 or +1.2 V at a scan rate of 0.1 mV/s.

Galvanostatic discharge/charge testing was conducted between voltage limits of -0.8 and +0.85 or +1.0 V versus  $\text{Ag}/\text{Ag}^+$  (~-2.2 and 3.9 or 4.0 V, vs.  $\text{Mg}/\text{Mg}^{2+}$ ) at a current density of 50 mA/g (0.07 mA/cm<sup>2</sup>). Rate capability tests were operated at current densities of 100 mA/g (0.14 mA/cm<sup>2</sup>) and 200 mA/g (0.28 mA/cm<sup>2</sup>).

## References

1. S. Zhu, A. C. Marschilok, C.-Y. Lee, E. S. Takeuchi and K. J. Takeuchi, *Electrochemical and Solid-State Letters*, 2010, **13**, A98-A100.
2. K. J. Takeuchi, S. Z. Yau, M. C. Menard, A. C. Marschilok and E. S. Takeuchi, *ACS Applied Materials & Interfaces*, 2012, **4**, 5547-5554.
3. Y.-s. Ding, X.-f. Shen, S. Sithambaram, S. Gomez, R. Kumar, V. M. B. Crisostomo, S. L. Suib and M. Aindow, *Chemistry of Materials*, 2005, **17**, 5382-5389.

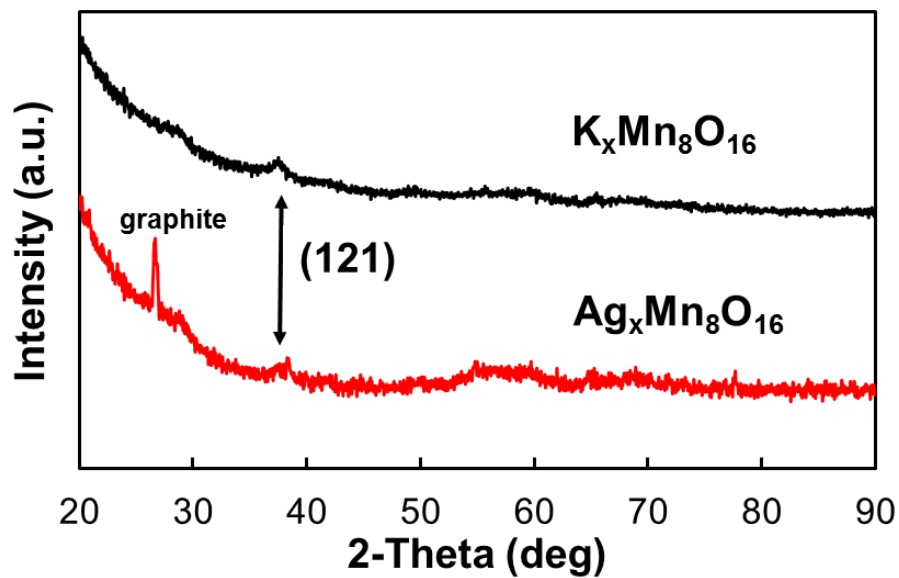

**Figure S1.** XRD patterns of  $Ag_xMn_8O_{16}$  (red) and  $K_xMn_8O_{16}$  (black) after cycling

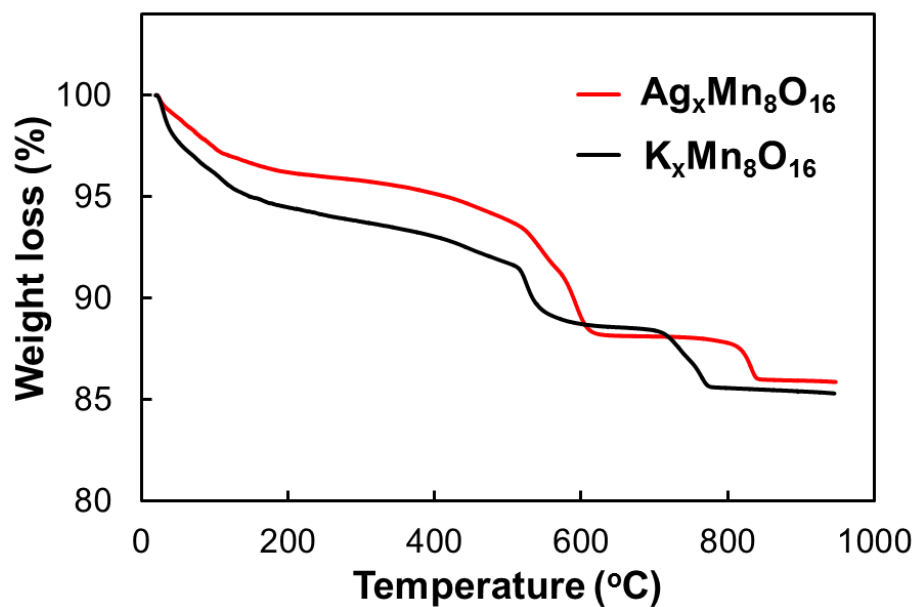

**Figure S2.** Thermogravimetric analysis (TGA) data of  $Ag_xMn_8O_{16}$  (red) and  $K_xMn_8O_{16}$  (black).

| Sample                                                 | Mn 2p [eV]        |                   | O1s                   |         |          |
|--------------------------------------------------------|-------------------|-------------------|-----------------------|---------|----------|
|                                                        | 2p <sub>1/2</sub> | 2p <sub>3/2</sub> | State                 | BE [eV] | Area [%] |
| K <sub>x</sub> Mn <sub>8</sub> O <sub>16</sub>         | 654.3             | 642.8             | O <sub>lattice</sub>  | 528.14  | 56.5     |
|                                                        |                   |                   | O <sub>surface</sub>  | 528.99  | 37.6     |
|                                                        |                   |                   | O <sub>adsorbed</sub> | 532.87  | 5.9      |
| Cycled K <sub>x</sub> Mn <sub>8</sub> O <sub>16</sub>  | 653.2             | 641.8             | O <sub>lattice</sub>  | 528.21  | 9.5      |
|                                                        |                   |                   | O <sub>surface</sub>  | 530.66  | 55.3     |
|                                                        |                   |                   | O <sub>adsorbed</sub> | 532.60  | 35.2     |
| Ag <sub>x</sub> Mn <sub>8</sub> O <sub>16</sub>        | 653.8             | 642.3             | O <sub>lattice</sub>  | 527.99  | 52.8     |
|                                                        |                   |                   | O <sub>surface</sub>  | 529.46  | 23.0     |
|                                                        |                   |                   | O <sub>adsorbed</sub> | 531.36  | 24.2     |
| Cycled Ag <sub>x</sub> Mn <sub>8</sub> O <sub>16</sub> | 652.8             | 641.3             | O <sub>lattice</sub>  | 528.90  | 8.7      |
|                                                        |                   |                   | O <sub>surface</sub>  | NA      | NA       |
|                                                        |                   |                   | O <sub>adsorbed</sub> | 531.72  | 91.3     |

**Table S1.** Mn 2p binding energies, O 1s binding energies and relative areas of K<sub>x</sub>Mn<sub>8</sub>O<sub>16</sub> and Ag<sub>x</sub>Mn<sub>8</sub>O<sub>16</sub>.
